# Supplementary material for: Stimulation of Neurite Outgrowth in Cerebrocortical Neurons by Sodium Channel Activator Brevetoxin-2 Requires Both N-Methyl-D-aspartate Receptor 2B (GluN2B) and p21 Protein (Cdc42/Rac)-Activated Kinase 1 (PAK1)
Source: MDPI journal article supplement (doi:10.3390/md20090559), 2022-08-31
Supplement: s1 [file s1]

Article

# Stimulation of Neurite Outgrowth in Cerebrocortical Neurons by Sodium Channel Activator Brevetoxin-2 Requires Both N-Methyl-D-aspartate Receptor 2B (GluN2B) and p21 Protein (Cdc42/Rac)-Activated Kinase 1 (PAK1)

Suneet Mehrotra <sup>1,2</sup>, Marsha L. Pierce <sup>1,3</sup>, Shashank M. Dravid <sup>1</sup> and Thomas F. Murray <sup>1,\*</sup>

<sup>1</sup> Department of Pharmacology and Neuroscience, School of Medicine, Creighton University, Omaha, NE 68178, USA

<sup>2</sup> Omeros, Seattle, WA 98119, USA

<sup>3</sup> Department of Pharmacology, College of Graduate Studies, Northwestern University, Downers Grove, IL 60515, USA

\* Correspondence: [tfmurray@creighton.edu](mailto:tfmurray@creighton.edu); Tel.: +1-402-280-2319

## Supplementary Figure S1

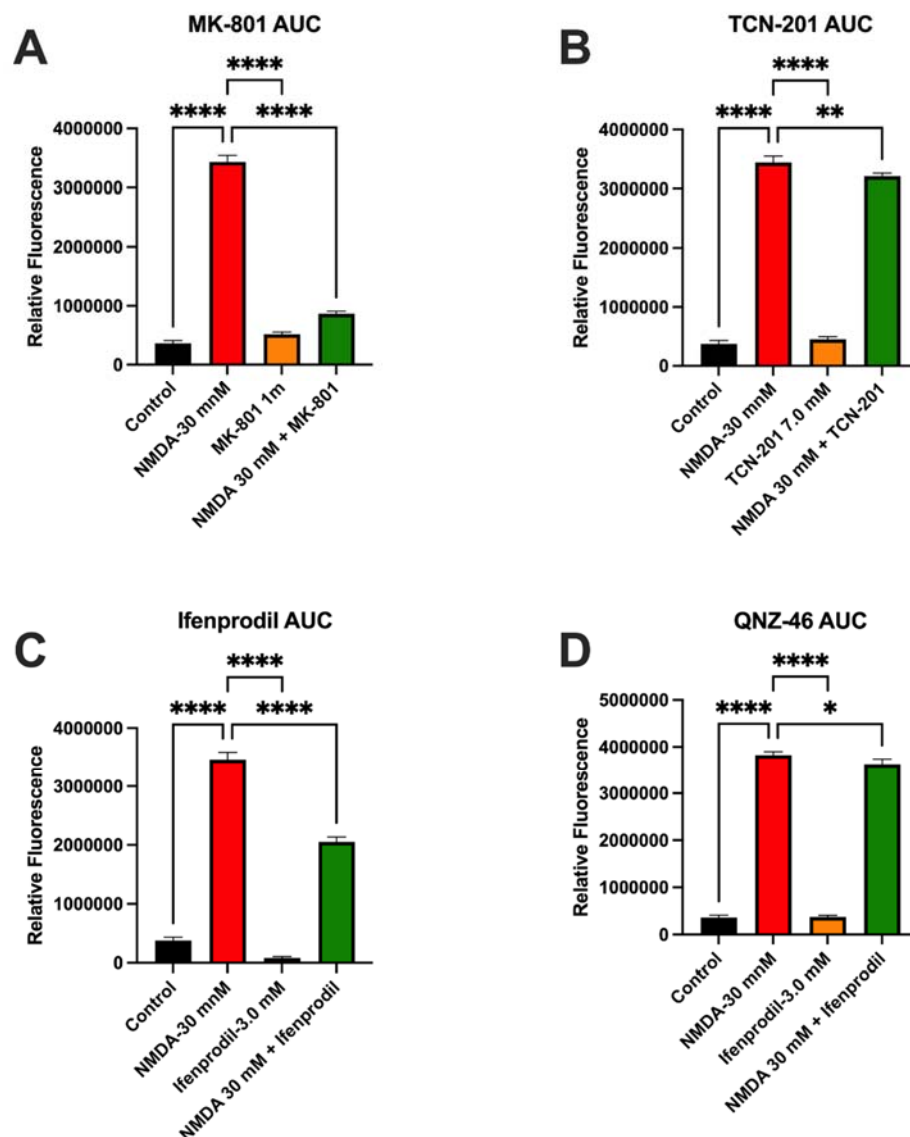

**Figure S1.** Area under the curve (AUC) was assessed and a one-way ANOVA with multiple comparisons were performed to determine statistical significance for the effects of pretreatment with NMDA-channel blocker MK-801 (**A**), noncompetitive GluN2A antagonist TCN-201 (**B**), noncompetitive GluN2B antagonist ifenprodil (**C**), and GluN2C and 2D antagonist QNZ-46 (**D**) on NMDA-induced  $\text{Ca}^{2+}$  influx (Figure 1A-D). Data shown represent the mean  $\pm$  SEM of 3 experiments.

Supplementary Figure S2

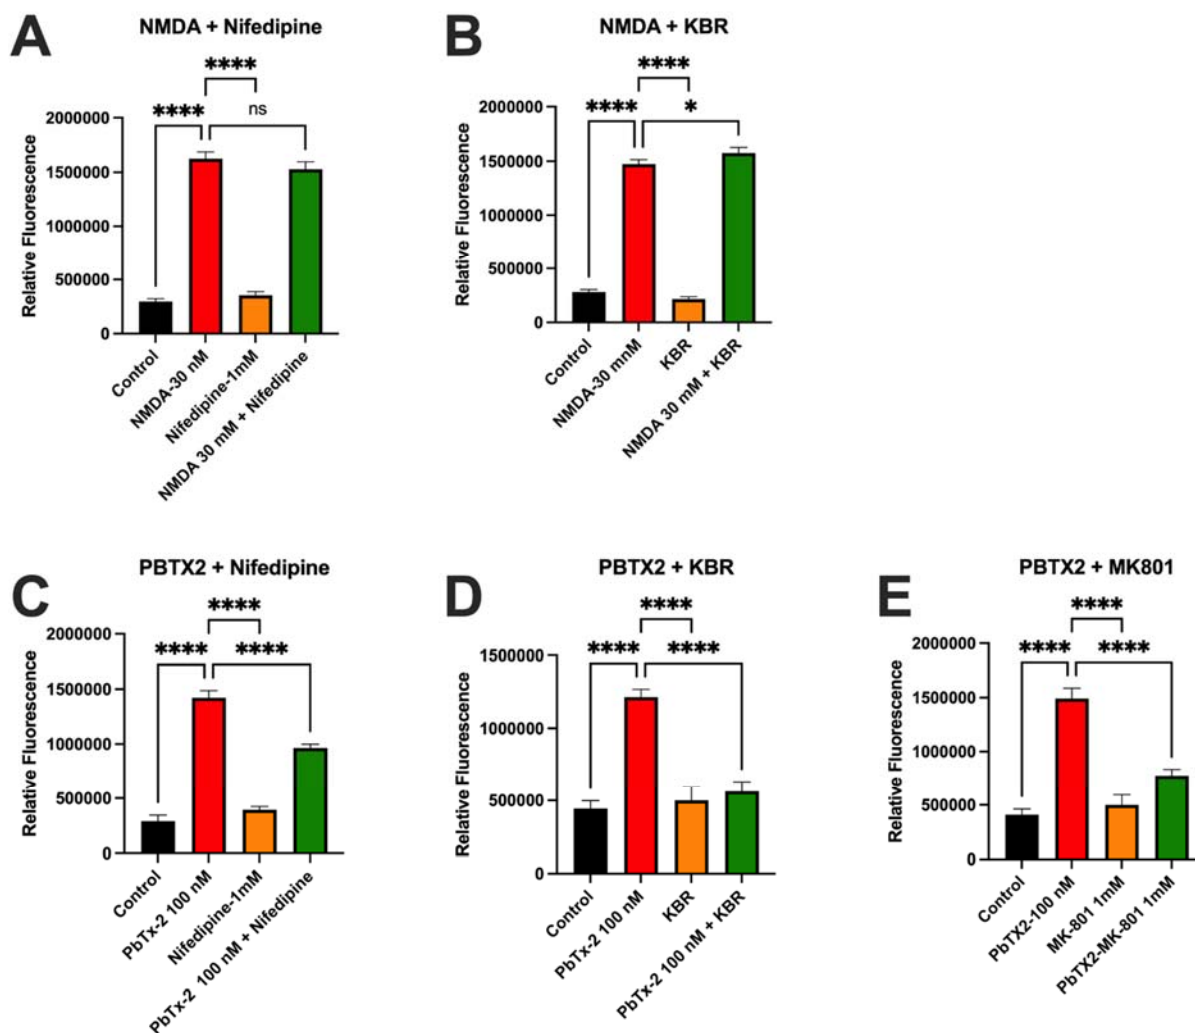

**Figure S2.** AUC was assessed and a one-way ANOVA with multiple comparisons were performed to determine statistical significance for the effects of pretreatment with nifedipine (A), reverse sodium-calcium exchanger KB-R7943 (B) on NMDA-induced  $\text{Ca}^{2+}$  influx and nifedipine (C), KB-R7943 (D) and MK-801 (E) on PbTx-2-induced  $\text{Ca}^{2+}$  influx (Figure 2A–E). Data shown represent the mean  $\pm$  SEM of 3 experiments.

Supplementary Figure S3.

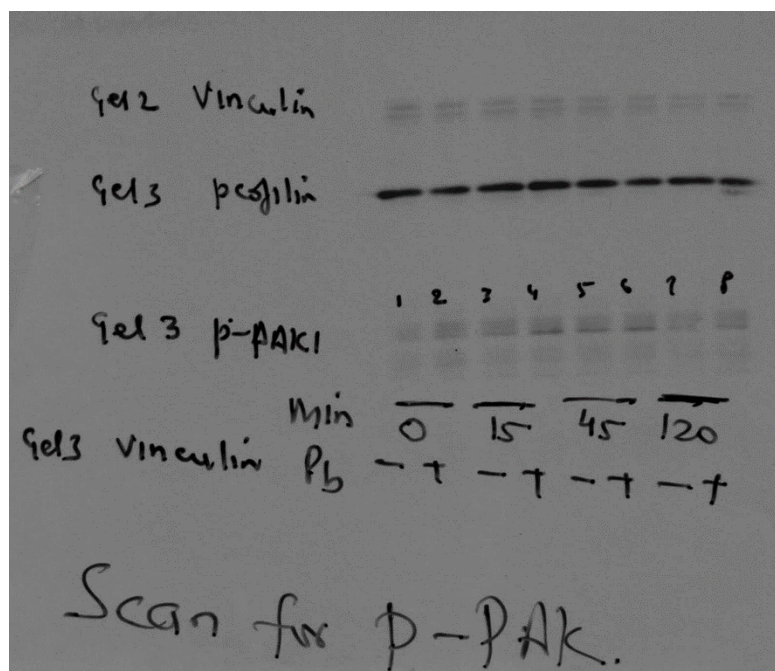

Figure S3. Raw data for p-PAK Western Blot.

Supplementary Figure S4

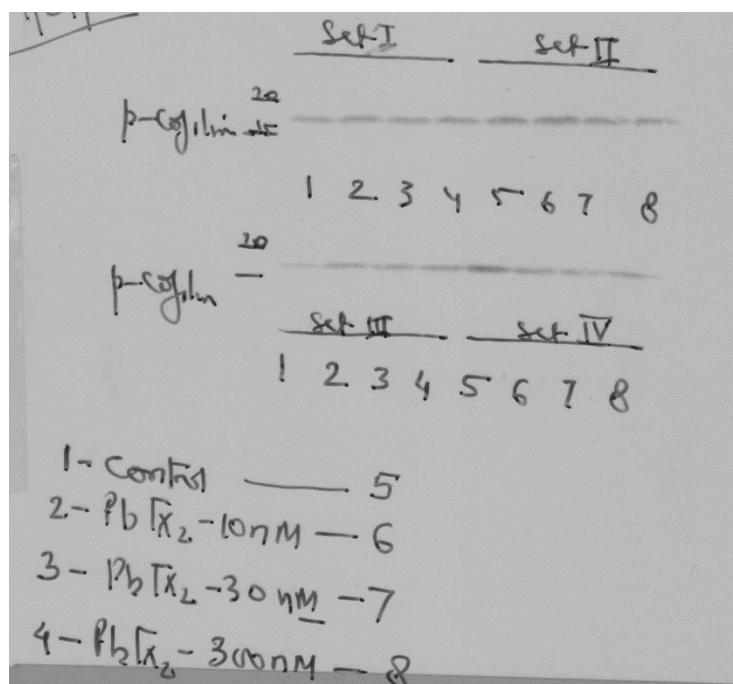

Figure S4. Raw data for p-cofilin Western Blot.
